# Supplementary material for: Non-Native Ambrosia Beetles as Opportunistic Exploiters of Living but Weakened Trees
Source: PLoS One. 2015 Jul 2;10(7):e0131496. doi: 10.1371/journal.pone.0131496 (PMC4489854; doi:10.1371/journal.pone.0131496)
Supplement: S2 Fig — (XLSX) [file pone.0131496.s004.xlsx]

## Sheet: Sheet1
S4 Supporting information for Figure 3
Ohio
		day 3
		ethanol ug per g tissue
Dogwood	control	0
Dogwood	control	0
Dogwood	control	0
Dogwood	control	0
Dogwood	control	0
Dogwood	control	0
Dogwood	control	0
Dogwood	control	0
Dogwood	flooded	57.3274
Dogwood	flooded	8.23906
Dogwood	flooded	2.37625
Dogwood	flooded	3.48816
Dogwood	flooded	17.2334
Dogwood	flooded	0.0582463
Dogwood	flooded	19.2808
Dogwood	flooded	5.83292
Styrax	control	0
Styrax	control	0
Styrax	control	0
Styrax	control	0
Styrax	control	0
Styrax	control	0
Styrax	control	0
Styrax	control	0
Styrax	flooded	6.21702
Styrax	flooded	9.77677
Styrax	flooded	22.8382
Styrax	flooded	22.8161
Styrax	flooded	22.7893
Styrax	flooded	14.6223
Styrax	flooded	9.07124
Styrax	flooded	1.48287
Redbud	control	0
Redbud	control	0
Redbud	control	0
Redbud	control	0
Redbud	control	0
Redbud	control	0
Redbud	control	0
Redbud	control	0
Redbud	flooded	56.46
Redbud	flooded	0.15
Redbud	flooded	13.75
Redbud	flooded	4.64
Redbud	flooded	9.83
Redbud	flooded	11.24
Redbud	flooded	0
Redbud	flooded	3.44
Maple	control	0
Maple	control	0
Maple	control	0
Maple	control	0
Maple	control	0
Maple	control	0
Maple	control	0
Maple	control	0
Maple	flooded	0.0649473
Maple	flooded	0
Maple	flooded	0.150097
Maple	flooded	3.02778
Maple	flooded	0
Maple	flooded	2.69151
Maple	flooded	10.9719
Maple	flooded	0.113886
Elm	control	0
Elm	control	0
Elm	control	0
Elm	control	0
Elm	control	0
Elm	control	0
Elm	control	0
Elm	control	0
Elm	flooded	0
Elm	flooded	0
Elm	flooded	0
Elm	flooded	0
Elm	flooded	3.16616
Elm	flooded	0
Elm	flooded	0
Elm	flooded	0
Cherry	control	0
Cherry	control	0
Cherry	control	0
Cherry	control	0
Cherry	control	0
Cherry	control	0
Cherry	control	0
Cherry	control	0
Cherry	flooded	1.18414
Cherry	flooded	0
Cherry	flooded	0.0503251
Cherry	flooded	0.223666
Cherry	flooded	0
Cherry	flooded	0.334993
Cherry	flooded	0.267927
Cherry	flooded	0.502865
River Birch	control	0
River Birch	control	0
River Birch	control	0
River Birch	control	0
River Birch	control	0
River Birch	control	0
River Birch	control	0
River Birch	control	0
River Birch	flooded	0
River Birch	flooded	0
River Birch	flooded	0
River Birch	flooded	0
River Birch	flooded	0
River Birch	flooded	0
River Birch	flooded	0
River Birch	flooded	0
Swamp Oak	control	0
Swamp Oak	control	0
Swamp Oak	control	0
Swamp Oak	control	0
Swamp Oak	control	0
Swamp Oak	control	0
Swamp Oak	control	0
Swamp Oak	control	0
Swamp Oak	flooded	0
Swamp Oak	flooded	0
Swamp Oak	flooded	0
Swamp Oak	flooded	0
Swamp Oak	flooded	0
Swamp Oak	flooded	0
Swamp Oak	flooded	0
Swamp Oak	flooded	0
Virginia
		ug ethanol per g tissue
Dogwood	flooded	13.0833
Dogwood	flooded	14.9506
Dogwood	flooded	23.8451
Dogwood	flooded	54.0414
Dogwood	flooded	55.5824
Dogwood	flooded	26.1984
Dogwood	control	0.0780676
Dogwood	control	0
Dogwood	control	0
Dogwood	control	0
Dogwood	control	0
Dogwood	control	0
Cherry	flooded	0
Cherry	flooded	0
Cherry	flooded	32.5595
Cherry	flooded	13.7406
Cherry	flooded	9.86639
Cherry	flooded	0
Cherry	control	0
Cherry	control	0
Cherry	control	0
Cherry	control	0
Cherry	control	0
Cherry	control	0
redbud	flooded	0
redbud	flooded	7.27207
redbud	flooded	13.957
redbud	flooded	0
redbud	flooded	0
redbud	flooded	0
redbud	control	0
redbud	control	5.4913
redbud	control	0
redbud	control	0
redbud	control	0
redbud	control	0
maple	flooded	0
maple	flooded	0
maple	flooded	4.24236
maple	flooded	0
maple	flooded	0
maple	flooded	0
maple	control	0
maple	control	0
maple	control	0
maple	control	0
maple	control	0
maple	control	0
oak	flooded	0
oak	flooded	0
oak	flooded	0
oak	flooded	2.1557
oak	flooded	0
oak	flooded	0
oak	control	0
oak	control	0.75644
oak	control	0
oak	control	0
oak	control	0
oak	control	0
magnolia	flooded	0
magnolia	flooded	0
magnolia	flooded	0
magnolia	flooded	0
magnolia	flooded	2.94589
magnolia	flooded	0
magnolia	control	0
magnolia	control	0
magnolia	control	0
magnolia	control	0
magnolia	control	0
magnolia	control	0
