# Supplementary material for: Non-Native Ambrosia Beetles as Opportunistic Exploiters of Living but Weakened Trees
Source: PLoS One. 2015 Jul 2;10(7):e0131496. doi: 10.1371/journal.pone.0131496 (PMC4489854; doi:10.1371/journal.pone.0131496)
Supplement: S3 Fig — (XLSX) [file pone.0131496.s005.xlsx]

## Sheet: Sheet1
S5 Supporting information for Figure 4
	Ohio
	Ethanol levels and attacks
			Day 3
			ug ethanol per g tissue	Day 15 attacks
	Dogwood	control	0	0
	Dogwood	control	0	0
	Dogwood	control	0	0
	Dogwood	control	0	0
	Dogwood	control	0	0
	Dogwood	control	0	0
	Dogwood	control	0	0
	Dogwood	control	0	0
	Dogwood	flooded	57.3274	40
	Dogwood	flooded	8.23906	14
	Dogwood	flooded	2.37625	18
	Dogwood	flooded	3.48816	3
	Dogwood	flooded	17.2334	23
	Dogwood	flooded	0.0582463	0
	Dogwood	flooded	19.2808	42
	Dogwood	flooded	5.83292	3
	Styrax	control	0	0
	Styrax	control	0	0
	Styrax	control	0	0
	Styrax	control	0	0
	Styrax	control	0	0
	Styrax	control	0	0
	Styrax	control	0	0
	Styrax	control	0	0
	Styrax	flooded	6.21702	20
	Styrax	flooded	9.77677	1
	Styrax	flooded	22.8382	37
	Styrax	flooded	22.8161	11
	Styrax	flooded	22.7893	51
	Styrax	flooded	14.6223	8
	Styrax	flooded	9.07124	9
	Styrax	flooded	1.48287	20
	Redbud	control	0	0
	Redbud	control	0	0
	Redbud	control	0	0
	Redbud	control	0	0
	Redbud	control	0	0
	Redbud	control	0	0
	Redbud	control	0	0
	Redbud	control	0	0
	Redbud	flooded	56.46	13
	Redbud	flooded	0.15	0
	Redbud	flooded	13.75	7
	Redbud	flooded	4.64	2
	Redbud	flooded	9.83	6
	Redbud	flooded	11.24	12
	Redbud	flooded	0	2
	Redbud	flooded	3.44	4
	Maple	control	0	0
	Maple	control	0	0
	Maple	control	0	0
	Maple	control	0	0
	Maple	control	0	0
	Maple	control	0	0
	Maple	control	0	0
	Maple	control	0	0
	Maple	flooded	0.0649473	0
	Maple	flooded	0	0
	Maple	flooded	0.150097	0
	Maple	flooded	3.02778	0
	Maple	flooded	0	1
	Maple	flooded	2.69151	1
	Maple	flooded	10.9719	2
	Maple	flooded	0.113886	0
	Elm	control	0	0
	Elm	control	0	0
	Elm	control	0	0
	Elm	control	0	0
	Elm	control	0	0
	Elm	control	0	0
	Elm	control	0	0
	Elm	control	0	0
	Elm	flooded	0	1
	Elm	flooded	0	0
	Elm	flooded	0	0
	Elm	flooded	0	0
	Elm	flooded	3.16616	0
	Elm	flooded	0	0
	Elm	flooded	0	0
	Elm	flooded	0	0
	Cherry	control	0	0
	Cherry	control	0	0
	Cherry	control	0	0
	Cherry	control	0	0
	Cherry	control	0	0
	Cherry	control	0	0
	Cherry	control	0	0
	Cherry	control	0	0
	Cherry	flooded	1.18414	5
	Cherry	flooded	0	0
	Cherry	flooded	0.0503251	0
	Cherry	flooded	0.223666	0
	Cherry	flooded	0	0
	Cherry	flooded	0.334993	0
	Cherry	flooded	0.267927	0
	Cherry	flooded	0.502865	0
	River Birch	control	0	0
	River Birch	control	0	0
	River Birch	control	0	0
	River Birch	control	0	0
	River Birch	control	0	0
	River Birch	control	0	0
	River Birch	control	0	0
	River Birch	control	0	0
	River Birch	flooded	0	0
	River Birch	flooded	0	0
	River Birch	flooded	0	0
	River Birch	flooded	0	0
	River Birch	flooded	0	0
	River Birch	flooded	0	0
	River Birch	flooded	0	0
	River Birch	flooded	0	0
	Swamp Oak	control	0	0
	Swamp Oak	control	0	0
	Swamp Oak	control	0	0
	Swamp Oak	control	0	0
	Swamp Oak	control	0	0
	Swamp Oak	control	0	0
	Swamp Oak	control	0	0
	Swamp Oak	control	0	0
	Swamp Oak	flooded	0	0
	Swamp Oak	flooded	0	0
	Swamp Oak	flooded	0	0
	Swamp Oak	flooded	0	0
	Swamp Oak	flooded	0	0
	Swamp Oak	flooded	0	0
	Swamp Oak	flooded	0	0
	Swamp Oak	flooded	0	0
	Virginia
			Ethanol	Day 15 attacks
	Dogwood	flooded	13.0833	132
	Dogwood	flooded	14.9506	146
	Dogwood	flooded	23.8451	176
	Dogwood	flooded	54.0414	290
	Dogwood	flooded	55.5824	212
	Dogwood	flooded	26.1984	171
	Dogwood	control	0.0780676	0
	Dogwood	control	0	0
	Dogwood	control	0	0
	Dogwood	control	0	0
	Dogwood	control	0	0
	Dogwood	control	0	0
	cherry	Flooded	0	0
	cherry	Flooded	0	0
	cherry	Flooded	32.5595	12
	cherry	Flooded	13.7406	3
	cherry	Flooded	9.86639	2
	cherry	Flooded	0	0
	cherry	control	0	0
	cherry	control	0	0
	cherry	control	0	0
	cherry	control	0	0
	cherry	control	0	0
	cherry	control	0	0
	redbud	Flooded	0	0
	redbud	Flooded	7.27207	0
	redbud	Flooded	13.957	19
	redbud	Flooded	0	2
	redbud	Flooded	0	1
	redbud	Flooded	0	0
	redbud	Non-Flooded	0	0
	redbud	Non-Flooded	5.4913	1
	redbud	Non-Flooded	0	0
	redbud	Non-Flooded	0	0
	redbud	Non-Flooded	0	0
	redbud	Non-Flooded	0	0
	maple	flooded	0	0
	maple	flooded	0	0
	maple	flooded	4.24236	0
	maple	flooded	0	0
	maple	flooded	0	0
	maple	flooded	0	0
	maple	control	0	0
	maple	control	0	0
	maple	control	0	0
	maple	control	0	0
	maple	control	0	0
	maple	control	0	0
	oak	flooded	0	0
	oak	flooded	0	0
	oak	flooded	0	0
	oak	flooded	2.1557	0
	oak	flooded	0	0
	oak	flooded	0	0
	oak	control	0	0
	oak	control	0.75644	0
	oak	control	0	0
	oak	control	0	0
	oak	control	0	0
	oak	control	0	0
	magnolia	Flooded	0	0
	magnolia	Flooded	0	4
	magnolia	Flooded	0	1
	magnolia	Flooded	0	0
	magnolia	Flooded	2.94589	0
	magnolia	Flooded	0	0
	magnolia	control	0	0
	magnolia	control	0	0
	magnolia	control	0	0
	magnolia	control	0	0
	magnolia	control	0	0
	magnolia	control	0	0
